# Supplementary material for: Efficient blue-emitting electrophosphorescent organic light-emitting diodes using 2-(3,5-di(carbazol-9-yl)phenyl)-5-phenyl-1,3,4-oxadiazole as an ambipolar host
Source: Royal Society of Chemistry journal article supplement (doi:10.1039/c3ra43720e), 2013-01-01
Supplement: c3ra43720e.pdf [file c3ra43720e.pdf]

## Electronic Supporting Information:

# Efficient blue-emitting electrophosphorescent organic light-emitting diodes using 2-(3,5-di(carbazol-9-yl)phenyl)-5-phenyl-1,3,4-oxadiazole as an ambipolar host

Yadong Zhang, Wojciech Haske, Dengke Cai, Stephen Barlow, Bernard Kippelen\*, and  
Seth R. Marder\*

Center for Organic Photonics and Electronics (COPE), School of Chemistry and Biochemistry,  
and School of Electrical and Computer Engineering, Georgia Institute of Technology, Atlanta,  
Georgia 30332, USA

### Contents:

|                                        |     |
|----------------------------------------|-----|
| 1. Figures Showing Thermal Data        | PS2 |
| 2. Figure and Table of Optical Data    | PS3 |
| 3. Figure Showing Electrochemical Data | PS4 |
| 4. NMR Spectra of New Compounds        | PS5 |

1. Figure Showing Thermal Data:

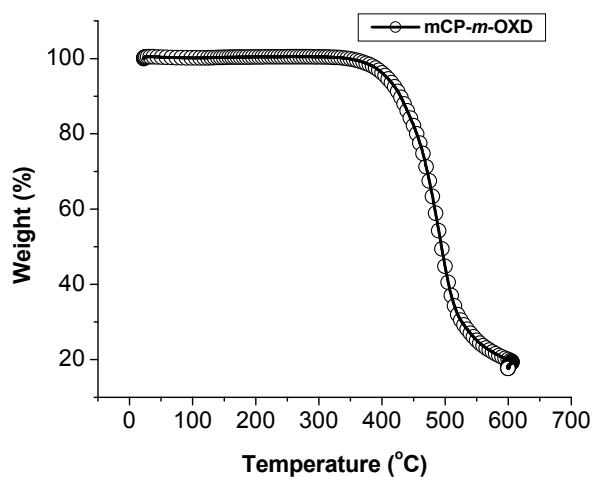

**Fig S1** Thermogravimetric data for mCPmOXD2 obtained at a heating rate of  $20\text{ }^{\circ}\text{C min}^{-1}$  under inert atmosphere.

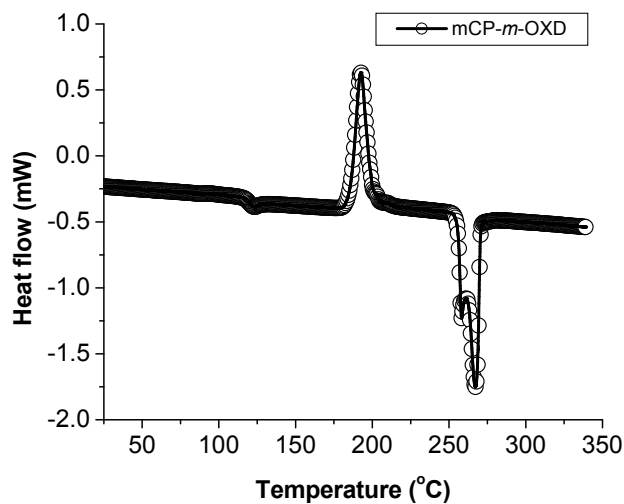

**Fig S2** DSC data for **1** obtained at a heating rate of  $10\text{ }^{\circ}\text{C min}^{-1}$ , showing a  $T_g$  at around  $120\text{ }^{\circ}\text{C}$ , followed by a recrystallization and melt at higher temperatures.

## 2. Figure and Table of Optical Data:

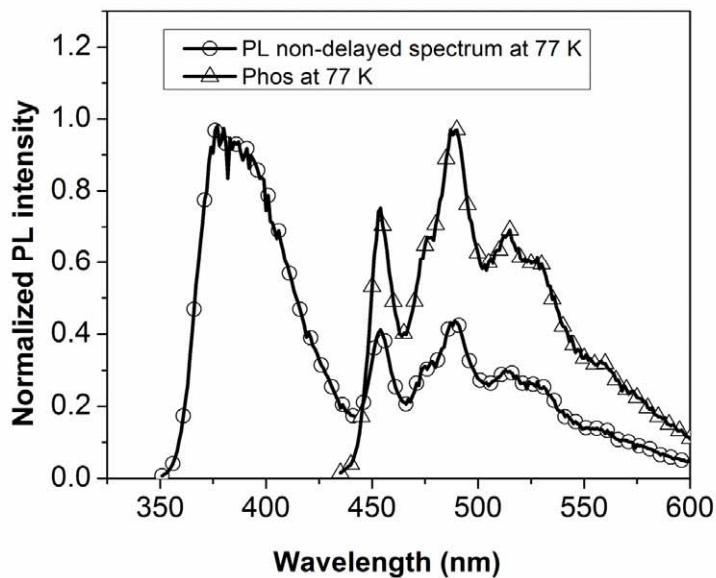

**Fig S3** Comparison of photoluminescence spectra of **1** (77 K, 2-methyltetrahydrofuran) and without a 50  $\mu$ s detector delay.

**Table S1** Experimental Optical Data for **1** and the closely related previously reported<sup>1</sup> compound **V**.

|          | absorption <sup>a</sup>            |                              |                                | fluorescence <sup>a</sup>          |                              | phosphorescence <sup>b</sup> |                            |
|----------|------------------------------------|------------------------------|--------------------------------|------------------------------------|------------------------------|------------------------------|----------------------------|
|          | $\lambda_{\text{max}} / \text{nm}$ | $E_{\text{max}} / \text{eV}$ | $E_{\text{onset}} / \text{eV}$ | $\lambda_{\text{max}} / \text{nm}$ | $E_{\text{max}} / \text{eV}$ | $\lambda_{0,0} / \text{nm}$  | $E_{\text{T}} / \text{eV}$ |
| <b>1</b> | 234, 292, 337                      | 4.30, 4.25, 3.68             | 3.31                           | 434                                | 2.86                         | 454                          | 2.73                       |
| <b>V</b> | 234, 292, 337                      | 4.30, 4.25, 3.68.            | 3.31                           | 434                                | 2.86                         | 456                          | 2.72                       |

<sup>a</sup>In dichloromethane at room temperature. <sup>b</sup>The highest energy feature in a spectrum recorded in 2-methyltetrahydrofuran at 77 K and taken as an estimate of the adiabatic triplet energy.

1 Y. Zhang, C. Zuniga, S.-J. Kim, D. Cai, S. Barlow, S. Salman, V. Coropceanu, J.-L. Brédas, B. Kippelen and S. Marder, *Chem. Mater.* 2011, **23**, 4002.

**3. Figure Showing Electrochemical Data:**

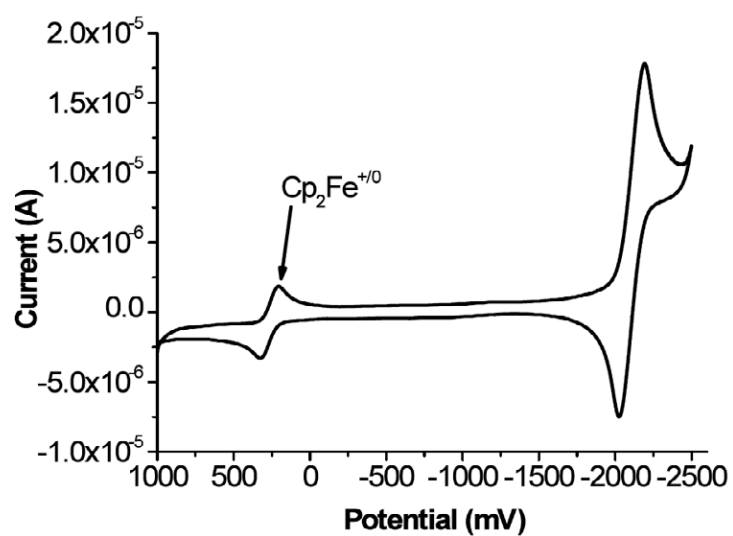

**Fig S4** Reductive cyclic voltammogram of **1** in THF / 0.1 M  $n\text{Bu}_4\text{NPF}_6$  with internal ferrocene.

#### 4. NMR Spectra of New Compounds

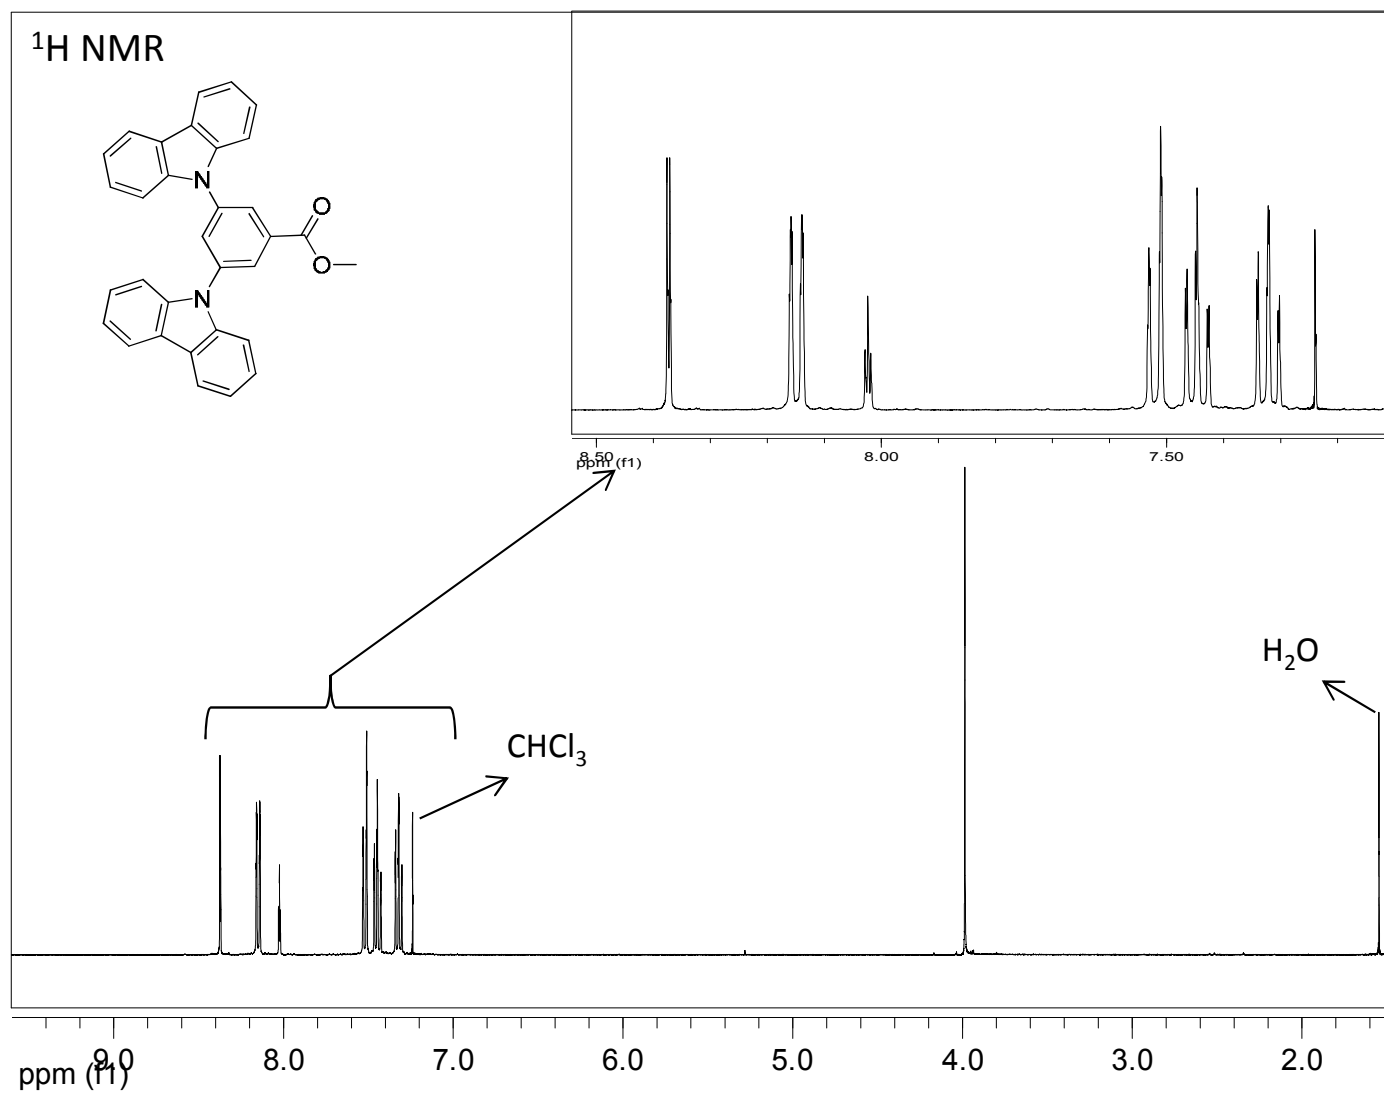

**Fig S5** <sup>1</sup>H NMR spectrum of methyl 3,5-di(carbazol-9-yl)benzoate in CDCl<sub>3</sub>.

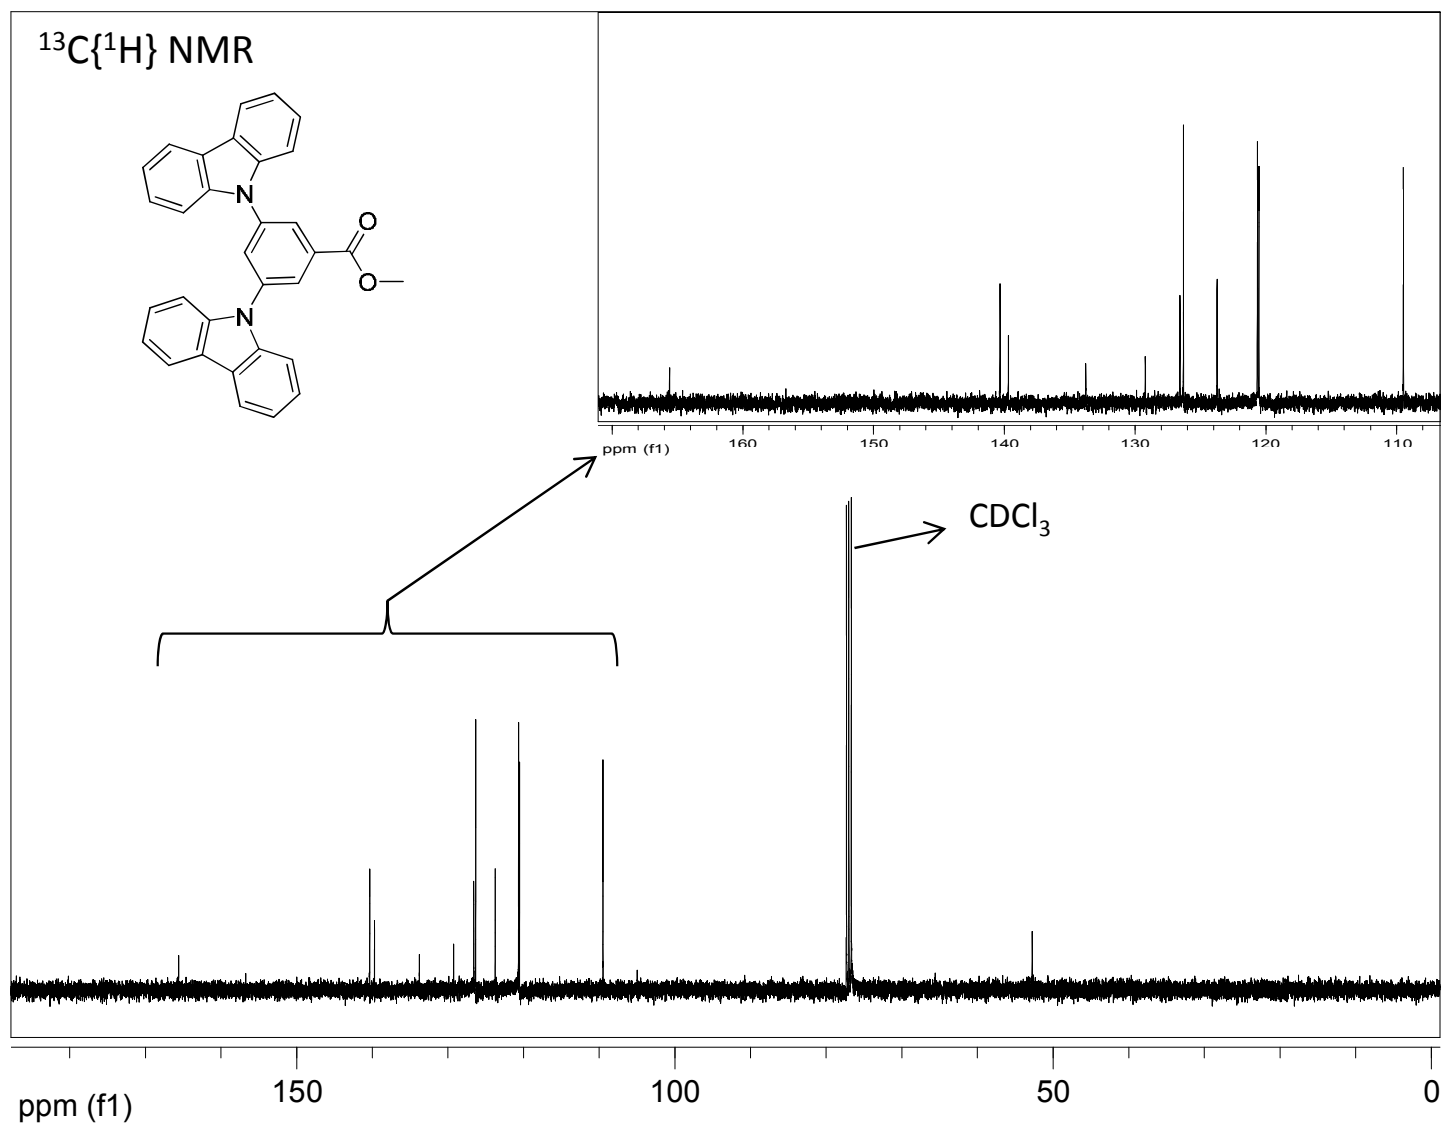

**Fig S6**  $^{13}\text{C}\{^1\text{H}\}$  NMR spectrum of methyl 3,5-di(carbazol-9-yl)benzoate in  $\text{CDCl}_3$ .

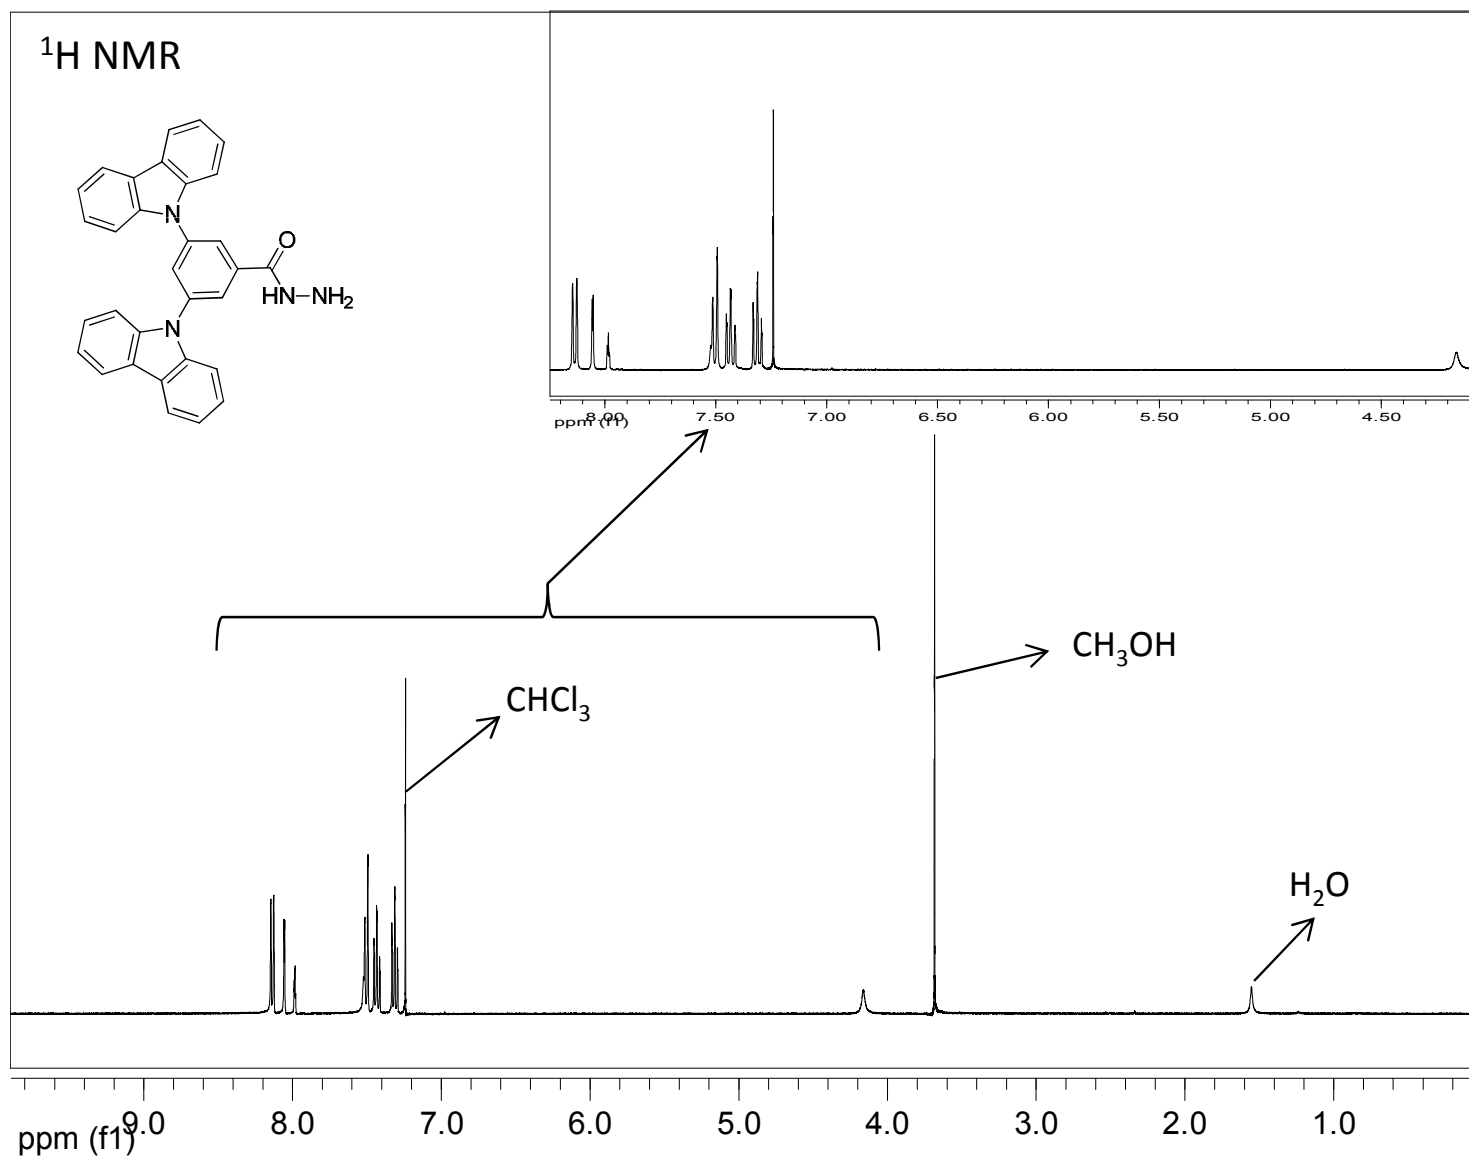

**Fig S7** <sup>1</sup>H NMR spectrum of 3,5-di(carbazol-9-yl)benzohydrazide in CDCl<sub>3</sub>.

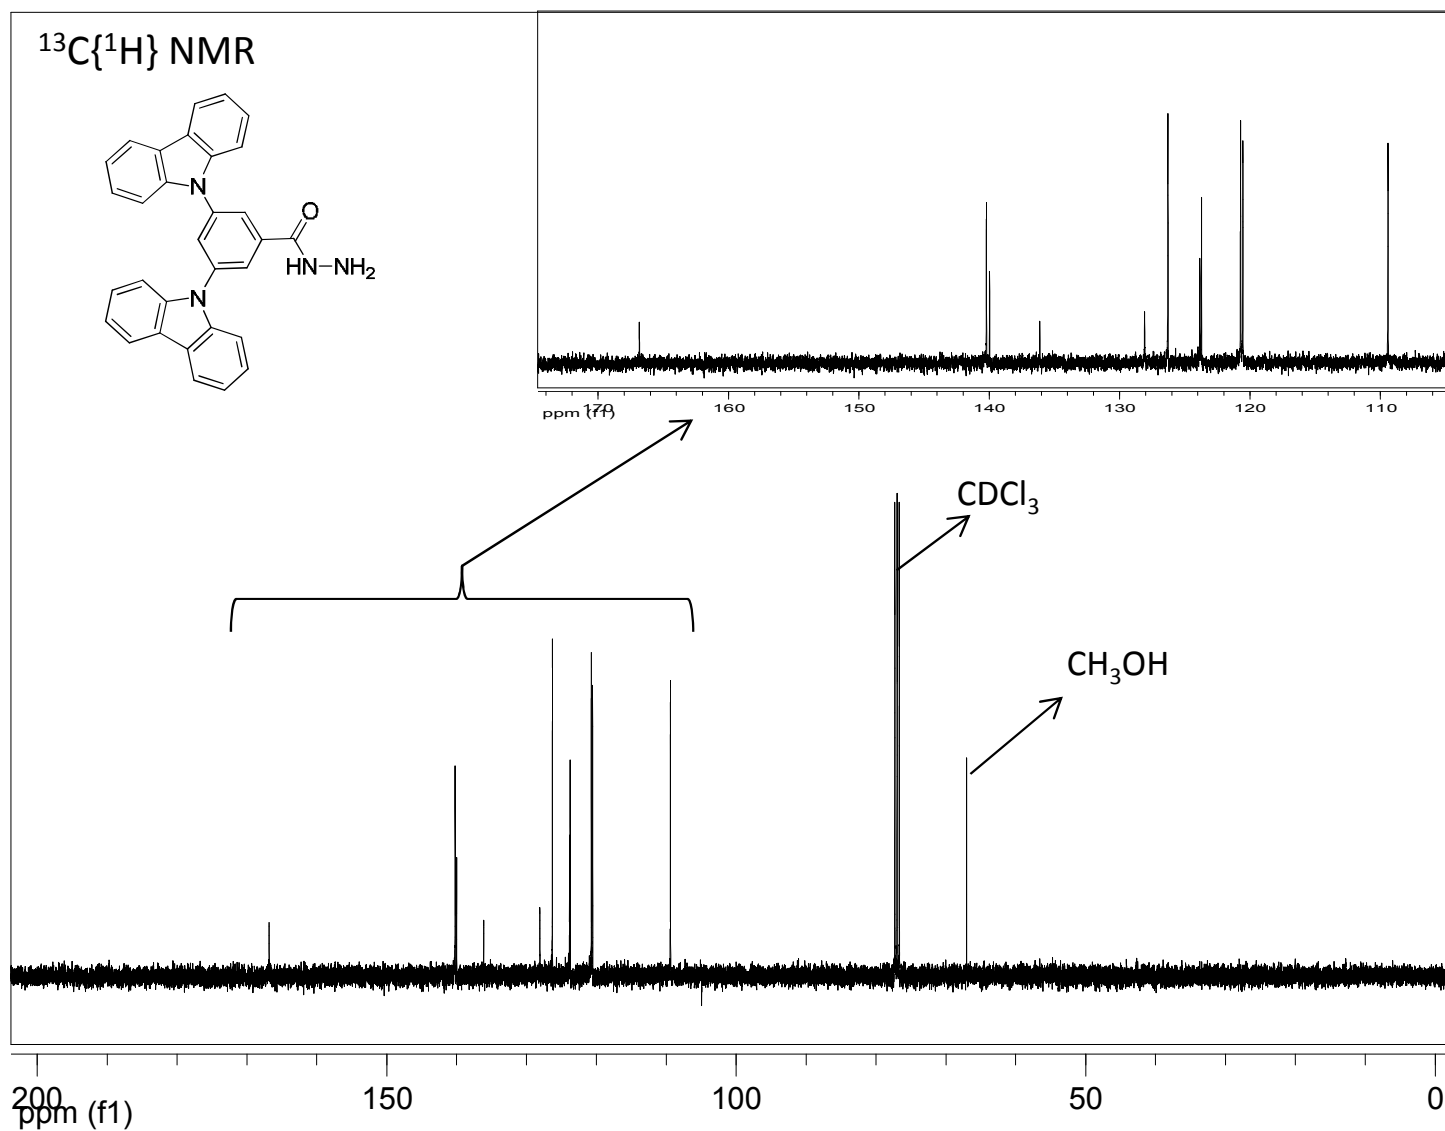

**Fig S8**  $^{13}\text{C}\{^1\text{H}\}$  NMR spectrum of 3,5-di(carbazol-9-yl)benzohydrazide in  $\text{CDCl}_3$ .



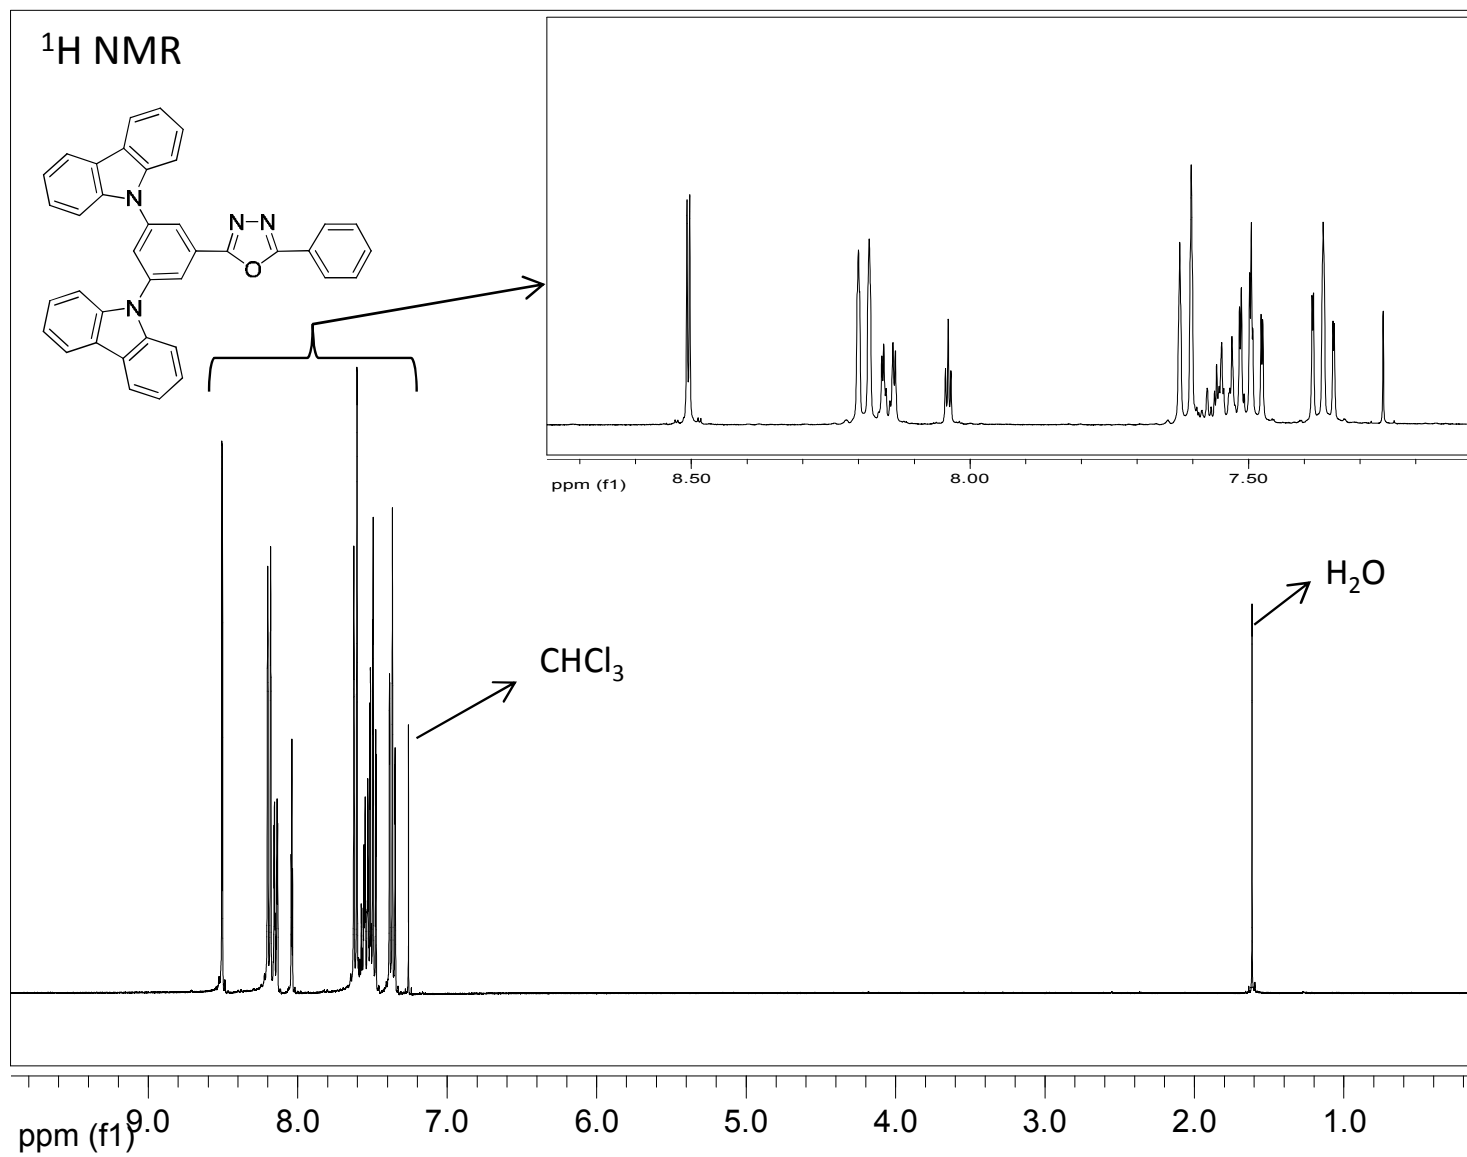

**Fig S9** <sup>1</sup>H NMR spectrum of 2-(3,5-di(carbazol-9-yl)phenyl)-5-phenyl-1,3,4-oxadiazole (**1**) in CDCl<sub>3</sub>.

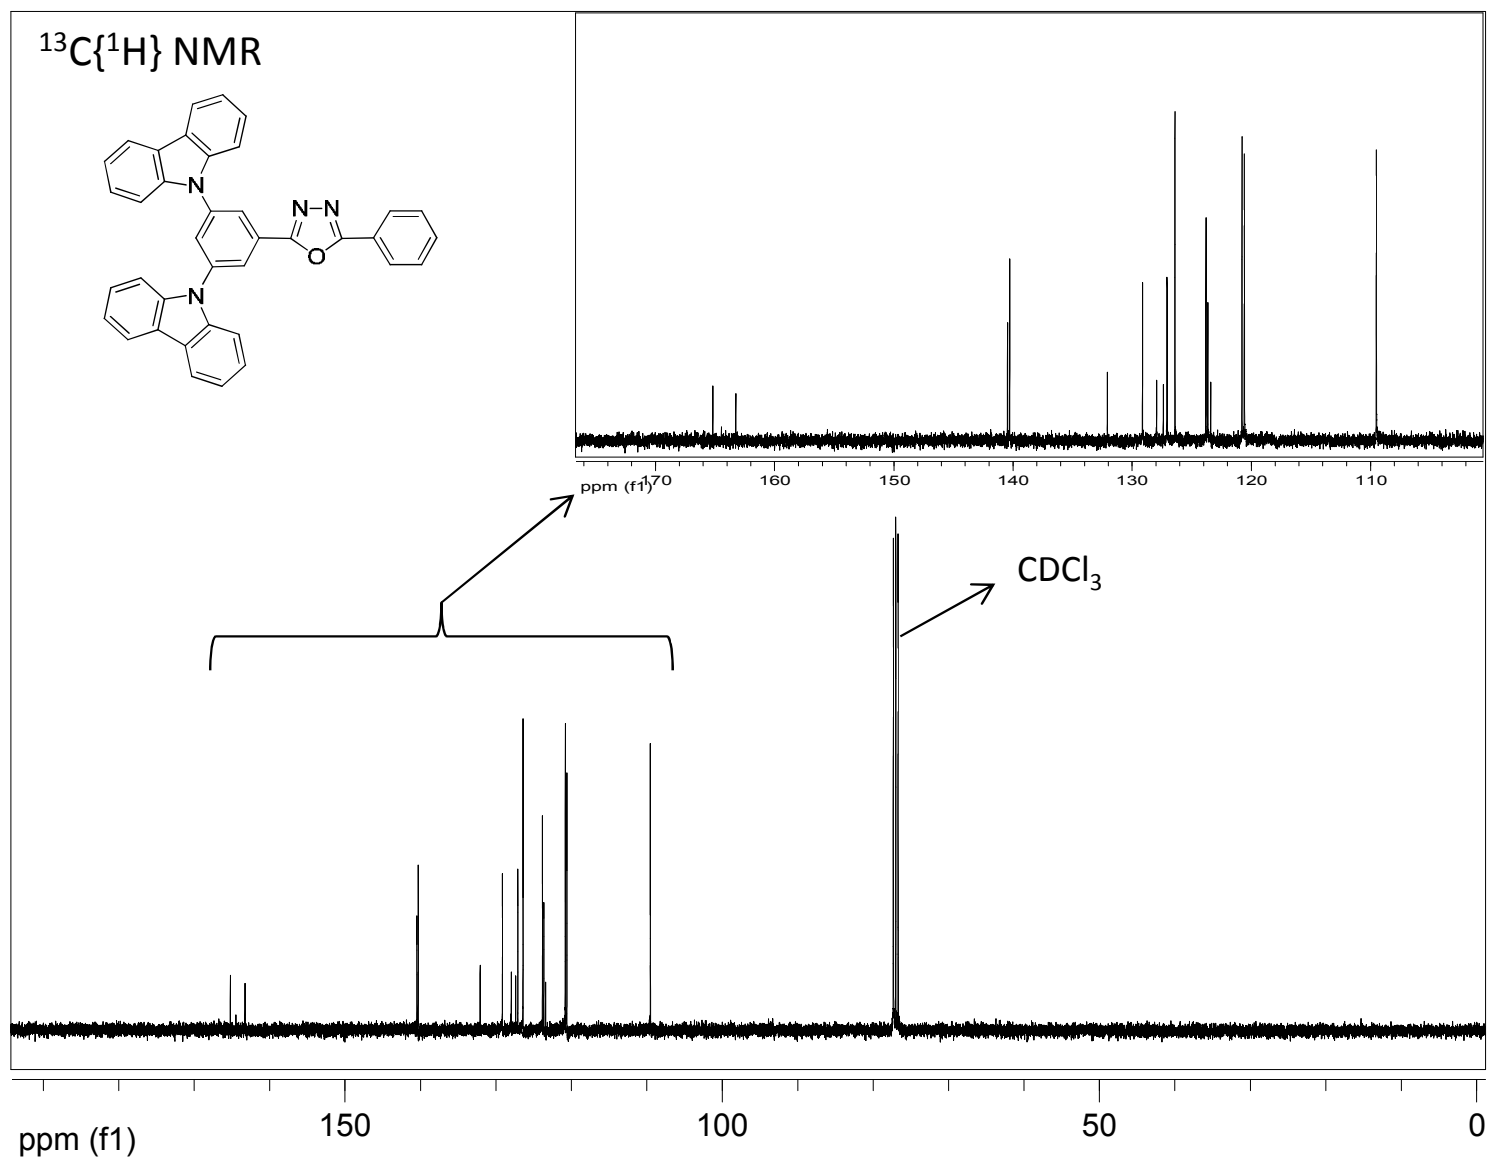

**Fig S10**  $^{13}\text{C}\{^1\text{H}\}$  NMR spectrum of 2-(3,5-di(carbazol-9-yl)phenyl)-5-phenyl-1,3,4-oxadiazole (**1**) in CDCl<sub>3</sub>.
